# Supplementary material for: Probing the structure of PEGylated-lipid assemblies by coarse-grained molecular dynamics
Source: Royal Society of Chemistry journal article supplement (doi:10.1039/c3sm52290c), 2013-01-01
Supplement: c3sm52290c.pdf [file c3sm52290c.pdf]

## SUPPLEMENTARY MATERIAL

### PEGylated Assemblies: the Effect of PEG concentration on Self-Assembly Shape as Studied by Coarse-grained Molecular Dynamics

Wataru Shinoda, Dennis E. Discher, Michael L. Klein, Sharon M. Loverde

**Supplementary Table 1.**

| Mol % PEG5-lipid | DPPC  | PEG5lipid | water    | time   | Wt % water |
|------------------|-------|-----------|----------|--------|------------|
| 2.2              | 10269 | 231       | 400000   | 500 ns | 73.6       |
|                  |       |           | (838000) | 100 ns | 85.3       |
| 10.5             | 9400  | 1100      | 400000   | 500 ns | 73.1       |
| 27.4             | 7625  | 2875      | 400000   | 500 ns | 72.2       |

**Supplementary Table 2.**

| Mol % PEG(5 or13)-lipid | DPPC | PEG-lipid         | Water  | time        |
|-------------------------|------|-------------------|--------|-------------|
| 10 Mol %                | 900  | 100 (PEG5-lipid)  | 179313 | 0.5 $\mu$ s |
| 30 Mol %                | 700  | 300 (PEG5-lipid)  | 178391 | 0.5 $\mu$ s |
| 50 Mol %                | 500  | 500 (PEG5-lipid)  | 177728 | 0.5 $\mu$ s |
| 10 Mol %                | 900  | 100 (PEG13-lipid) | 179313 | 0.5 $\mu$ s |
| 30 Mol %                | 700  | 300 (PEG13-lipid) | 178391 | 0.5 $\mu$ s |
| 50 Mol %                | 500  | 500 (PEG13-lipid) | 177728 | 0.5 $\mu$ s |

### Supplementary Table 3.

| Mol %<br>PEG5-<br>lipid | DMPC | PEG5-<br>lipid | Water | time   |
|-------------------------|------|----------------|-------|--------|
| 30 Mol %                | 22   | 10             | 22288 | 100 ns |
| 30 Mol %                | 68   | 28             | 22288 | 100 ns |
| 30 Mol %                | 140  | 60             | 22288 | 100 ns |
| 30 Mol %                | 202  | 86             | 22288 | 100 ns |
| 30 Mol %                | 274  | 118            | 22288 | 100 ns |
| 30 Mol %                | 358  | 154            | 22288 | 100 ns |
| 50 Mol %                | 16   | 16             | 22288 | 100 ns |
| 50 Mol %                | 48   | 48             | 22288 | 100 ns |
| 50 Mol %                | 100  | 100            | 22288 | 100 ns |
| 50 Mol %                | 144  | 144            | 22288 | 100 ns |
| 50 Mol %                | 196  | 196            | 22288 | 100 ns |
| 50 Mol %                | 256  | 256            | 22288 | 100 ns |
| 70 Mol %                | 10   | 22             | 22288 | 100 ns |
| 70 Mol %                | 28   | 68             | 22288 | 100 ns |
| 70 Mol %                | 60   | 140            | 22288 | 100 ns |
| 70 Mol %                | 86   | 202            | 22288 | 100 ns |
| 70 Mol %                | 118  | 274            | 22288 | 100 ns |
| 70 Mol %                | 154  | 358            | 22288 | 100 ns |

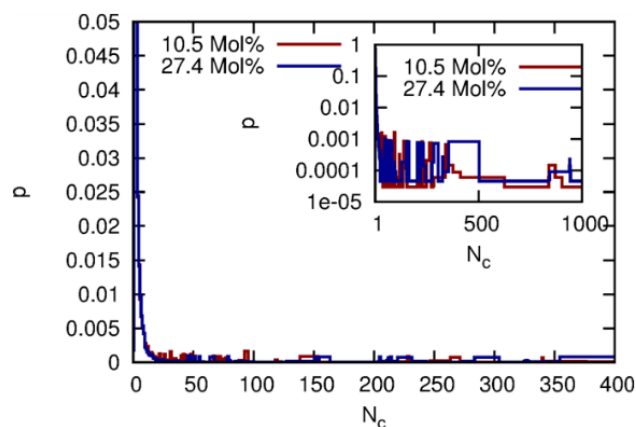

**Supplementary Figure 1.** There is a wide distribution of cluster sizes, ranging from unimers to a finite probability ( $< .0001$ ) of cluster sizes  $> 500$ . 10.5 and 27.4 Mol % PEG5lipid exhibit similar cluster size distributions after 0.5 microsecond runtime, with a sharp exponential peak that falls off after the unimer concentration, with a small probability of small micelles ( $< 80$  lipids) and larger bicelles ( $> 80$  lipids).

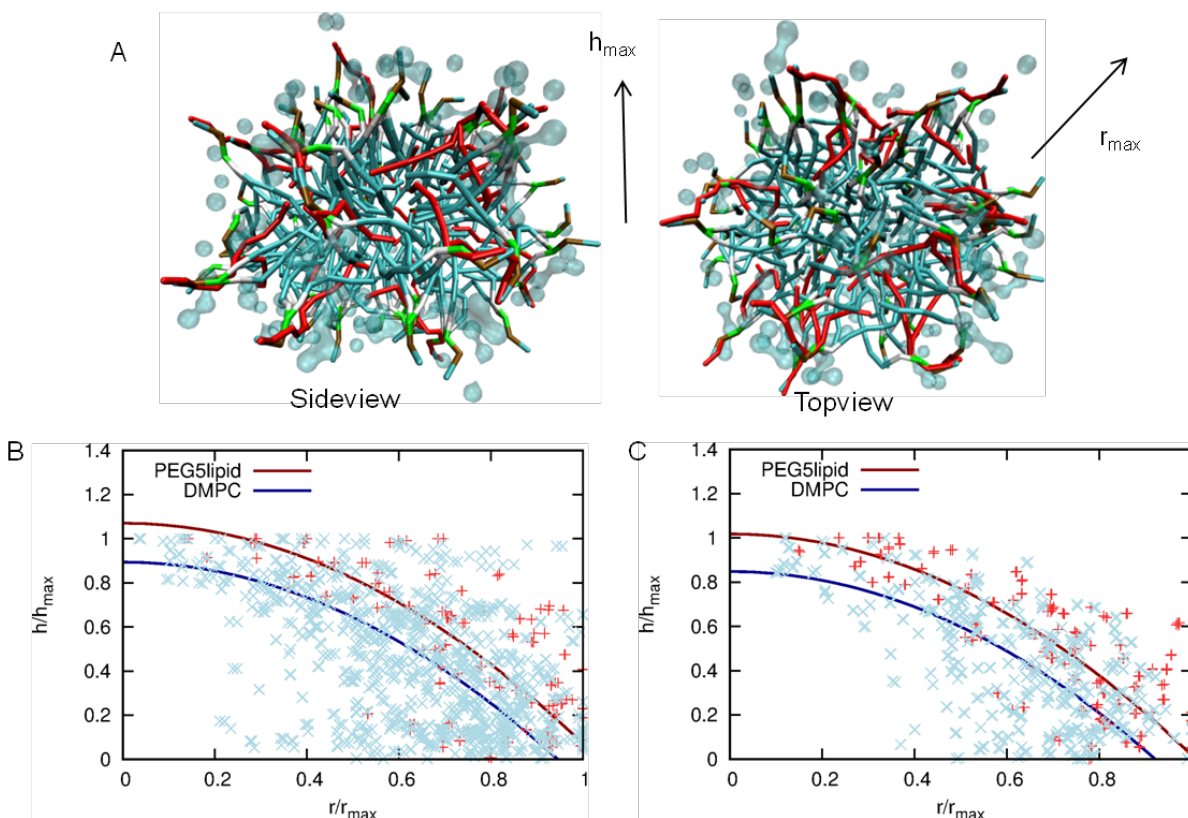

**Supplementary Figure 2.** A) Sideview and topview of a bicelle nucleus contained 74 lipids. Fluid like blobs represent water within  $4.5 \text{ \AA}$  of micelle. In the topview, note that PEG5lipids occupy the space towards the outer radius from the center of mass of the micelle. Center of mass location for PEG5lipids and DMPC after 100ns for B) 10.5 Mol % PEG5lipid and C) 27.4 Mol % lipid. PEGylated lipid occupies the positions towards to the outer radius of the bicelle. The bicelle shape can be characterized with a height,  $h$ , and radius,  $r$ , where  $h_{\max}$  and  $r_{\max}$  are the outermost and highest lipid locations for each bicelle respectively. (Averaging over size  $< 80$  lipids).

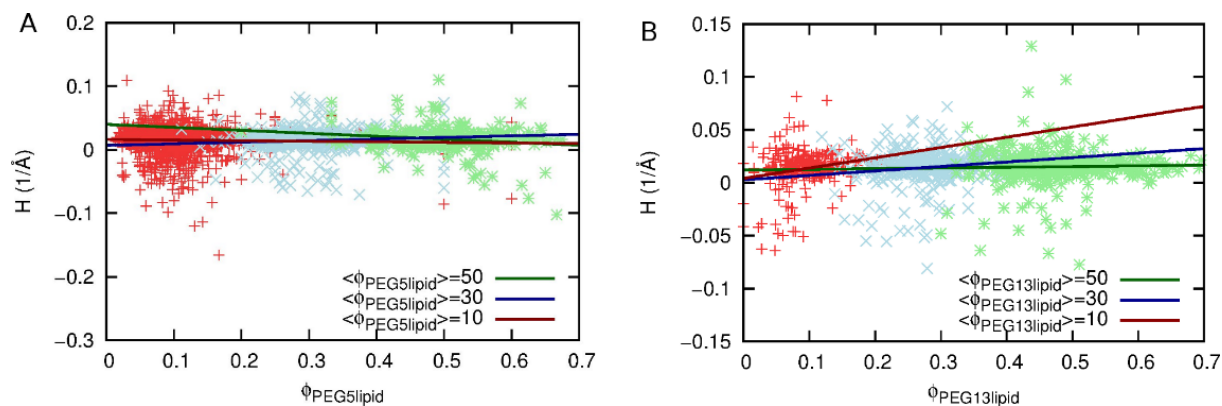

**Supplementary Figure 3.** Mean curvature,  $H$ , of bicelle as a function of the normalized interfacial concentration for two different PEGylated lipid lengths (5,13) and three different concentrations of PEGylated lipid (10, 30, 50 Mol %). A) PEG5lipid does not show a correlation of the mean curvature with interfacial concentration of the PEG5lipid. B) PEG13 lipid also does not show a clear correlation between mean curvature and interfacial concentration.

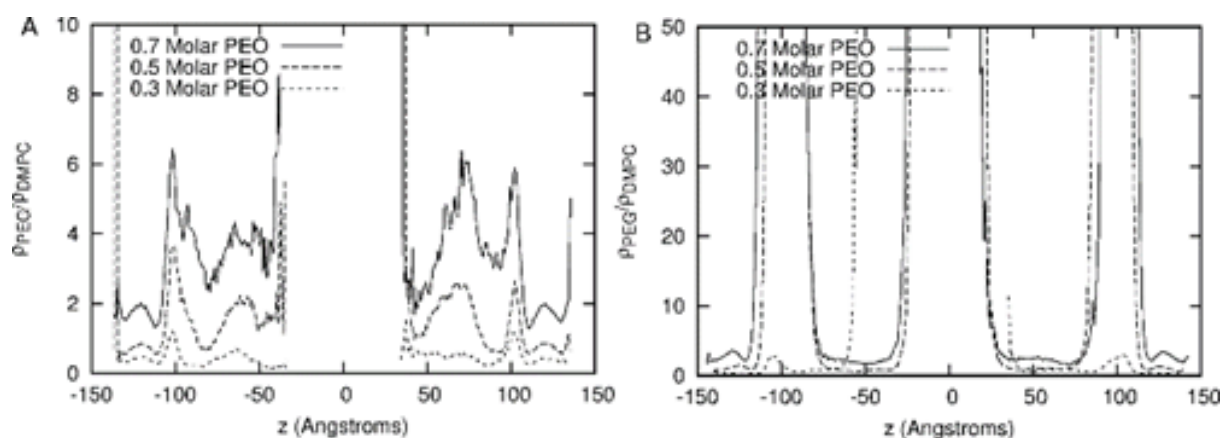

**Supplementary Figure 4.** Ratio of PEG5lipid density,  $\rho_{\text{PEG}}$ , to DMPC lipid density,  $\rho_{\text{DMPC}}$ , along the normal to the air-water interface. With increasing length of PEG from PEG5lipid (A) to PEG13lipid (B), the density ratio diverges at the micelle buds. PEG13 lipid prefers the micellar bud regions of positive curvature.
